# Supplementary material for: Development of DNA methylation‐based epigenetic age predictors in loblolly pine (Pinus taeda)
Source: PubMed Central journal article supplement — Mol Ecol Resour. 2022 Aug 24;23(1):131–44. doi: 10.1111/1755-0998.13698 (PMC10087248; doi:10.1111/1755-0998.13698), 2022-08-24
Supplement: MEN-23-131-s001.pdf [file MEN-23-131-s001.pdf]

# MOLECULAR ECOLOGY RESOURCES

## Supplemental Information for:

### Development of DNA methylation-based epigenetic age predictors in loblolly pine (*Pinus taeda*)

Steven T. Gardner, Emily M. Bertucci, Randall Sutton, Andy Horcher, Doug Aubrey, Benjamin B. Parrott

#### Table of Contents:

|                             |        |
|-----------------------------|--------|
| <b>Supplemental Table 1</b> | Page 2 |
| <b>Supplemental Table 2</b> | Page 3 |
| <b>Supplemental Table 3</b> | Page 4 |
| <b>Supplemental Table 4</b> | Page 5 |
| <b>Supplemental Table 5</b> | Page 6 |
| <b>Supplemental Table 6</b> | Page 7 |
| <b>Supplemental Table 7</b> | Page 8 |
| <b>Supplemental Table 8</b> | Page 9 |

# MOLECULAR ECOLOGY RESOURCES

Supplemental Table 1. Top 35 associated ( $R > |0.5|$ ) CpG cytosines with age

| Site  | Scaffold        | Position | Spearman Correlation | P Value  | Cytosine Region | Blast (400 BP Window)                                                | Score | E Value  |
|-------|-----------------|----------|----------------------|----------|-----------------|----------------------------------------------------------------------|-------|----------|
| 2285  | APFE030121794.1 | 148      | 0.733324289          | 0.200629 | Open Sea        | gb AC241290.1  Pinus taeda clone PT_7Ba2797E03, complete sequence    | 470   | 0.00E+00 |
| 2337  | APFE030124122.1 | 12062    | 0.785210138          | 0.039398 | Open Sea        | gb BT124256.1  Picea sitchensis clone WS0472_E12 unknown mRNA        | 70    | 7.00E-08 |
| 2609  | APFE030139045.1 | 4737     | -0.701942338         | 0.163116 | Island          | gb KY860920.1  Pinus resinosa 26S ribosomal RNA gene, partial se...  | 636   | e-178    |
| 6977  | APFE030396059.1 | 43236    | -0.701776429         | 0.197521 | Open Sea        | gb MG601102.1  Cyanophora sudaie strain NIES-764 plastid, complet... | 46    | 1.00E+00 |
| 8868  | APFE030505808.1 | 60757    | -0.771286772         | 0.039398 | Open Sea        | gb CP025669.1  Ipomoea triloba cultivar NCNSP0323 chromosome 10      | 46    | 1.00E+00 |
| 9298  | APFE030528492.1 | 85496    | -0.7185338           | 0.259254 | Open Sea        | gb AC241325.1  Pinus taeda clone PT_7Ba3500A10, complete sequence    | 50    | 6.40E-02 |
| 10631 | APFE030607390.1 | 36759    | 0.733581091          | 0.152312 | Open Sea        | gb CP020627.1  Oryzias latipes strain HSOK chromosome 7              | 46    | 1.00E+00 |
| 10683 | APFE030610080.1 | 1878     | -0.787534698         | 0.037945 | Shore           | gb KY860920.1  Pinus resinosa 26S ribosomal RNA gene, partial se...  | 466   | 0.00E+00 |
| 10999 | APFE030628375.1 | 133954   | 0.745142979          | 0.087837 | Open Sea        | gb BT124256.1  Picea sitchensis clone WS0472_E12 unknown mRNA        | 54    | 4.00E-03 |
| 12558 | APFE030723726.1 | 3588     | 0.713815944          | 0.197521 | Open Sea        | gb AC241323.1  Pinus taeda clone PT_7Ba3301B13, complete sequence    | 242   | 8.00E-60 |
| 13231 | APFE030757442.1 | 2043     | -0.772075559         | 0.039398 | Island          | gb KY860920.1  Pinus resinosa 26S ribosomal RNA gene, partial se...  | 620   | 0.00E+00 |
| 13232 | APFE030757442.1 | 2050     | -0.733794929         | 0.087837 | Island          | gb KY860920.1  Pinus resinosa 26S ribosomal RNA gene, partial se...  | 620   | 0.00E+00 |
| 14053 | APFE030813233.1 | 186110   | 0.724660269          | 0.234612 | Shore           | gb HM853297.1  Pinus pinaster malate dehydrogenase (mdhB) gene, ...  | 244   | 2.00E-60 |
| 14054 | APFE030813233.1 | 186111   | 0.843901008          | 0.022294 | Shore           | gb HM853297.1  Pinus pinaster malate dehydrogenase (mdhB) gene, ...  | 244   | 2.00E-60 |
| 14822 | APFE030850014.1 | 54663    | 0.816034678          | 0.022294 | Open Sea        | gb HM853297.1  Pinus pinaster malate dehydrogenase (mdhB) gene, ...  | 180   | 180      |
| 14942 | APFE030857403.1 | 29845    | 0.735732823          | 0.180792 | Open Sea        | gb AC241265.2  Pinus taeda clone PT_7Ba0002H13, complete sequence    | 58    | 3.00E-04 |
| 15815 | APFE030906103.1 | 61       | -0.759087976         | 0.087837 | Open Sea        | gb AC241294.1  Pinus taeda clone PT_7Ba2900I02, complete sequence    | 688   | 0.00E+00 |
| 16078 | APFE030921614.1 | 53438    | 0.726587083          | 0.197521 | Open Sea        | gb AC241337.1  Pinus taeda clone PT_7Ba3875B09, complete sequence    | 82    | 2.00E-11 |
| 17458 | APFE030995767.1 | 1961     | -0.791747065         | 0.039398 | Island          | gb KY860920.1  Pinus resinosa 26S ribosomal RNA gene, partial se...  | 771   | 0        |
| 17856 | APFE031018063.1 | 67260    | 0.776231876          | 0.069032 | Open Sea        | gb BT124256.1  Picea sitchensis clone WS0472_E12 unknown mRNA        | 62    | 2.00E-05 |
| 17859 | APFE031018063.1 | 67326    | 0.797507607          | 0.037945 | Open Sea        | gb BT124256.1  Picea sitchensis clone WS0472_E12 unknown mRNA        | 62    | 2.00E-05 |
| 17861 | APFE031018063.1 | 67332    | 0.758537543          | 0.069032 | Open Sea        | gb BT124256.1  Picea sitchensis clone WS0472_E12 unknown mRNA        | 62    | 2.00E-05 |
| 17863 | APFE031018063.1 | 67347    | 0.73406183           | 0.152312 | Open Sea        | gb BT124256.1  Picea sitchensis clone WS0472_E12 unknown mRNA        | 62    | 2.00E-05 |
| 18567 | APFE031061272.1 | 514      | -0.708346272         | 0.152312 | Island          | gb KC143594.1  Pinus environmental sample clone CEobese239 18S r...  | 706   | 0.00E+00 |
| 19887 | APFE031135765.1 | 151      | -0.725477173         | 0.197521 | Open Sea        | b DQ987896.1  Pseudolarix amabilis 18S ribosomal RNA gene, part...   | 729   | 0.00E+00 |
| 22491 | APFE031293786.1 | 340      | -0.730607956         | 0.090228 | Open Sea        | gb KY860920.1  Pinus resinosa 26S ribosomal RNA gene, partial se...  | 591   | 0.00E+00 |
| 23567 | APFE031355998.1 | 7890     | -0.754060344         | 0.044969 | Shore           | gb KY860920.1  Pinus resinosa 26S ribosomal RNA gene, partial se...  | 747   | 0.00E+00 |
| 23568 | APFE031355998.1 | 7893     | -0.711891658         | 0.108527 | Shore           | gb KY860920.1  Pinus resinosa 26S ribosomal RNA gene, partial se...  | 747   | 0.00E+00 |
| 23883 | APFE031371374.1 | 84904    | -0.709469987         | 0.300498 | Open Sea        | gb AC241351.1  Pinus taeda clone PT_7Ba4290D18, complete sequence    | 204   | 2.00E-48 |
| 23905 | APFE031373268.1 | 7107     | -0.705844592         | 0.156773 | Shore           | gb AF051798.1 AF051798 Pinus elliottii 18S ribosomal RNA gene, p...  | 714   | 0.00E+00 |
| 24067 | APFE031387609.1 | 58957    | 0.779370555          | 0.037945 | Open Sea        | gb CP035221.1  Enterococcus faecium strain SRCM103470 plasmid un...  | 48    | 0.25     |
| 27180 | APFE031573243.1 | 563      | -0.757349385         | 0.069032 | Open Sea        | gb AC241294.1  Pinus taeda clone PT_7Ba2900I02, complete sequence    | 456   | 0.00E+00 |
| 27813 | APFE031614217.1 | 1073     | 0.707631993          | 0.302344 | Open Sea        | gb AC241290.1  Pinus taeda clone PT_7Ba2797E03, complete sequence    | 307   | 1.00E-79 |
| 28563 | APFE031657460.1 | 12503    | 0.761006635          | 0.069032 | Shore           | gb AC241353.2  Pinus taeda clone PT_7Ba4304M17, complete sequence    | 143   | 6.00E-30 |
| 5810  | APFE030328443.1 | 923      | 0.699906162          | 0.000412 | Open Sea        | gb AC241290.1  Pinus taeda clone PT_7Ba2797E03, complete sequence    | 359   | 5.00E-95 |

# MOLECULAR ECOLOGY RESOURCES

Supplemental Table 2. Top 35 associated ( $R > |0.5|$ ) CHG cytosines with age

| Site  | Scaffold        | Position | Spearman Correlation | P Value  | Cytosine Region | Blast (400 BP Window)                                               | Score | E Value  |
|-------|-----------------|----------|----------------------|----------|-----------------|---------------------------------------------------------------------|-------|----------|
| 202   | APFE030007596.1 | 38804    | -0.806365265         | 0.020114 | Island          | gb AC241265.2  Pinus taeda clone PT_7Ba0002H13, complete sequence   | 68    | 3.00E-07 |
| 220   | APFE030007596.1 | 38951    | -0.821055717         | 0.004205 | Island          | gb AC241265.2  Pinus taeda clone PT_7Ba0002H13, complete sequence   | 68    | 3.00E-07 |
| 3482  | APFE030156380.1 | 346800   | -0.806273887         | 0.00961  | Island          | gb AC241265.2  Pinus taeda clone PT_7Ba0002H13, complete sequence   | 131   | 2.00E-26 |
| 3483  | APFE030156380.1 | 346815   | -0.809991495         | 0.008432 | Island          | gb AC241265.2  Pinus taeda clone PT_7Ba0002H13, complete sequence   | 131   | 2.00E-26 |
| 3484  | APFE030156380.1 | 346822   | -0.857443238         | 0.002486 | Island          | gb AC241265.2  Pinus taeda clone PT_7Ba0002H13, complete sequence   | 131   | 2.00E-26 |
| 3492  | APFE030156380.1 | 346895   | -0.811874711         | 0.004205 | Island          | gb AC241265.2  Pinus taeda clone PT_7Ba0002H13, complete sequence   | 131   | 2.00E-26 |
| 5613  | APFE030266102.1 | 32477    | 0.865293812          | 0.002336 | Open Sea        | gb EU367255.1  Rhopalosoma nearcticum elongation factor 1-alpha ... | 56    | 0.001    |
| 5614  | APFE030266102.1 | 32482    | 0.831553804          | 0.004205 | Open Sea        | gb JQ519677.1  Rhopalosoma sp. SK-2012 voucher DM400 elongation ... | 56    | 1.00E-03 |
| 6868  | APFE030325783.1 | 180321   | -0.826493806         | 0.007519 | Open Sea        | gb AC241340.1  Pinus taeda clone PT_7Ba3966E14, complete sequence   | 230   | 3.00E-56 |
| 7022  | APFE030333153.1 | 146989   | 0.826364455          | 0.004205 | Open Sea        | gb CP028303.1  Acidovorax avenae subsp. avenae strain SH7 chromo... | 48    | 0.25     |
| 7023  | APFE030333153.1 | 146995   | 0.852965503          | 0.002336 | Open Sea        | gb CP028303.1  Acidovorax avenae subsp. avenae strain SH7 chromo... | 48    | 0.25     |
| 7147  | APFE030338471.1 | 63835    | -0.800726612         | 0.01105  | Open Sea        | gb AC241283.1  Pinus taeda clone PT_7Ba0038G01, complete sequence   | 129   | 9.00E-26 |
| 15504 | APFE030760562.1 | 10243    | 0.805669114          | 0.020114 | Open Sea        | gb AC241316.1  Pinus taeda clone PT_7Ba3194A17, complete sequence   | 66    | 1.00E-06 |
| 18359 | APFE030912860.1 | 23919    | -0.819701284         | 0.003041 | Open Sea        | gb AC241341.1  Pinus taeda clone PT_7Ba4050C22, complete sequence   | 101   | 2.00E-17 |
| 18362 | APFE030912860.1 | 23950    | -0.847644292         | 0.001927 | Open Sea        | gb AC241341.1  Pinus taeda clone PT_7Ba4050C22, complete sequence   | 101   | 2.00E-17 |
| 18363 | APFE030912860.1 | 23958    | -0.843464441         | 0.001927 | Open Sea        | gb AC241341.1  Pinus taeda clone PT_7Ba4050C22, complete sequence   | 101   | 2.00E-17 |
| 19149 | APFE030954374.1 | 218      | 0.79762914           | 0.023837 | Open Sea        | gb AC210511.1  Populus trichocarpa clone POP088-A15, complete se... | 52    | 1.60E-02 |
| 19270 | APFE030960074.1 | 37277    | -0.827238542         | 0.004542 | Open Sea        | gb AC241357.1  Pinus taeda clone PT_7Ba4350E08, complete sequence   | 466   | 0        |
| 20097 | APFE030995986.1 | 235730   | -0.891783455         | 0.000285 | Island          | gb AC241265.2  Pinus taeda clone PT_7Ba0002H13, complete sequence   | 88    | 3.00E-13 |
| 20098 | APFE030995986.1 | 235737   | -0.806875406         | 0.004205 | Island          | gb AC241265.2  Pinus taeda clone PT_7Ba0002H13, complete sequence   | 101   | 2.00E-17 |
| 23311 | APFE031152219.1 | 76212    | -0.797666493         | 0.023837 | Open Sea        | gb AC241341.1  Pinus taeda clone PT_7Ba4050C22, complete sequence   | 68    | 3.00E-07 |
| 23312 | APFE031152219.1 | 76219    | -0.882396735         | 0.002457 | Open Sea        | gb AC241341.1  Pinus taeda clone PT_7Ba4050C22, complete sequence   | 68    | 3.00E-07 |
| 23313 | APFE031152219.1 | 76224    | -0.860356057         | 0.004205 | Open Sea        | gb AC241341.1  Pinus taeda clone PT_7Ba4050C22, complete sequence   | 68    | 3E-07    |
| 23314 | APFE031152219.1 | 76230    | -0.860145005         | 0.004205 | Open Sea        | gb AC241341.1  Pinus taeda clone PT_7Ba4050C22, complete sequence   | 68    | 3E-07    |
| 23582 | APFE031170467.1 | 52691    | -0.827317018         | 0.003178 | Island          | gb AC241357.1  Pinus taeda clone PT_7Ba4350E08, complete sequence   | 196   | 4.00E-46 |
| 25825 | APFE031280591.1 | 16883    | 0.814571901          | 0.010805 | Open Sea        | gb HM853297.1  Pinus pinaster malate dehydrogenase (mdhB) gene, ... | 335   | 7.00E-88 |
| 26765 | APFE031328690.1 | 28908    | -0.791872159         | 0.007471 | Open Sea        | gb CP027084.1  Bos mutus isolate yakQH1 chromosome 16               | 52    | 2.00E-02 |
| 29521 | APFE031468650.1 | 339818   | -0.807382534         | 0.020114 | Shore           | gb AC241351.1  Pinus taeda clone PT_7Ba4290D18, complete sequence   | 444   | 0.00E+00 |
| 29826 | APFE031487846.1 | 62273    | -0.795522724         | 0.024835 | Island          | gb CP009524.1  Methanosarcina sp. Kolksee, complete genome          | 62    | 2.00E-05 |
| 32186 | APFE031612942.1 | 217743   | -0.829381363         | 0.007132 | Open Sea        | gb AC241277.1  Pinus taeda clone PT_7Ba0032C08, complete sequence   | 353   | 3.00E-93 |
| 32194 | APFE031612942.1 | 217788   | -0.828561852         | 0.004205 | Open Sea        | gb AC241277.1  Pinus taeda clone PT_7Ba0032C08, complete sequence   | 353   | 3.00E-93 |
| 32195 | APFE031612942.1 | 217808   | -0.791428701         | 0.010481 | Open Sea        | gb AC241277.1  Pinus taeda clone PT_7Ba0032C08, complete sequence   | 442   | 0.00E+00 |
| 32376 | APFE031619745.1 | 77331    | -0.821466976         | 0.003948 | Shore           | gb AC241270.1  Pinus taeda clone PT_7Ba0014H13, complete sequence   | 242   | 8.00E-60 |
| 32502 | APFE031626435.1 | 55430    | -0.83043222          | 0.004205 | Open Sea        | gb JQ262265.1  Pinus radiata isolate 5586 anonymous locus 0_1789... | 101   | 2.00E-17 |
| 33496 | APFE031678658.1 | 149227   | -0.857466165         | 0.004205 | Open Sea        | gb FJ111945.1  Pinus taeda isolate 4476 anonymous locus UMN_3406... | 180   | 3.00E-41 |

# MOLECULAR ECOLOGY RESOURCES

| Site                            | Robustness | Scaffold        | Position | Pearson Correlation | P Value   | Cytosine Region | Supplemental Table 3. CpG elastic net model                                                                        | Blast (400 BP Window) | Score | E Value  | Model Coefficient |             |
|---------------------------------|------------|-----------------|----------|---------------------|-----------|-----------------|--------------------------------------------------------------------------------------------------------------------|-----------------------|-------|----------|-------------------|-------------|
| 1363                            | 0          | APFE030080639.1 | 200083   | -0.6543418          | 0.6348307 | Open Sea        | ref XM_014455775.2  PREDICTED: Myotis lucifugus helicase like transcription factor (HLTF)                          |                       | 46    | 1        | -0.137325946      |             |
| 1467                            | 4          | APFE030085865.1 | 142328   | 0.6758028           | 0.6348307 | Open Sea        | gb AC241341.1  Pinus taeda clone PT_7Ba4050C22, complete sequence                                                  |                       | 62    | 2.00E-05 | 0.018496764       |             |
| 1921                            | 1          | APFE030116671.1 | 2305     | -0.7126756          | 0.5844494 | Shore           | gb KY860920.1  Pinus resinosa 26S ribosomal RNA gene, partial sequence                                             |                       | 448   | e-122    | -4.19E-05         |             |
| 5733                            | 37         | APFE030361284.1 | 36063    | 0.6357583           | 0.6791496 | Island          | gb AC241362.1  Pinus taeda clone PT_7Ba4455I19, complete sequence                                                  |                       | 311   | 1.00E-80 | 0.002094687       |             |
| 6241                            | 9          | APFE030396059.1 | 43218    | -0.7723175          | 0.461431  | Open Sea        | ref NC_038215.1  Cyonophora sudae strain NIES-764 plastid, complete genome                                         |                       | 46    | 1        | -0.015519385      |             |
| 6673                            | 2          | APFE030428449.1 | 50471    | 0.7102763           | 0.5844494 | Open Sea        | ref XM_009907161.1  PREDICTED: Picooides pubescens sirtuin 1 (SIRT1), partial mRNA                                 |                       | 46    | 1.00E+00 | 0.015477022       |             |
| 7261                            | 1          | APFE030463969.1 | 274227   | 0.6338211           | 0.6868999 | Open Sea        | gb AC241310.1  Pinus taeda clone PT_7Ba3100G06, complete sequence                                                  |                       | 174   | 2.00E-39 | 0.032544356       |             |
| 7785                            | 3          | APFE030499242.1 | 23944    | -0.7073769          | 0.5844494 | Open Sea        | gb BT109694.1  Picea glauca clone GQ03211_121 mRNA sequence                                                        |                       | 321   | 1.00E-83 | -0.01383886       |             |
| 8217                            | 0          | APFE030526453.1 | 7058     | -0.6899176          | 0.6348307 | Open Sea        | gb KF357095.1  Uncultured eukaryote clone 58 isolation-source soil oxic incubation Toh 18S ribosomal RNA gene      |                       | 517   | e-143    | -0.012800373      |             |
| 8273                            | 3          | APFE030528492.1 | 85496    | -0.7445607          | 0.5844494 | Open Sea        | gb AC241325.1  Pinus taeda clone PT_7Ba3500A10, complete sequence                                                  |                       | 50    | 6.40E-02 | -0.055725197      |             |
| 10300                           | 0          | APFE030660856.1 | 46646    | -0.7060463          | 0.5844494 | Island          | ref XM_015758670.2  PREDICTED: Oryza sativa Japonica Group proline-rich protein 36                                 |                       | 46    | 1.00E+00 | -0.049986507      |             |
| 10301                           | 8          | APFE030660856.1 | 46656    | -0.6761235          | 0.6348307 | Island          | ref XM_015758670.2  PREDICTED: Oryza sativa Japonica Group proline-rich protein 37                                 |                       | 46    | 1.00E+00 | -0.000208769      |             |
| 10304                           | 68         | APFE030660856.1 | 46679    | -0.7025156          | 0.6147431 | Island          | ref XM_015758670.2  PREDICTED: Oryza sativa Japonica Group proline-rich protein 38                                 |                       | 46    | 1.00E+00 | -0.021961049      |             |
| 11268                           | 0          | APFE030730360.1 | 106703   | 0.5990105           | 0.7699768 | Open Sea        | gb KM672426.1  Pinus strobus NADH dehydrogenase subunit 4 (nad4) gene, complete cds; mitochondrion                 |                       | 66    | 1.00E-06 | 0.017162217       |             |
| 11723                           | 0          | APFE030757442.1 | 2036     | -0.731721           | 0.5844494 | Island          | gb KY860920.1  Pinus resinosa 26S ribosomal RNA gene, partial sequence                                             |                       | 620   | e-174    | -0.000172028      |             |
| 11724                           | 0          | APFE030757442.1 | 2043     | -0.7375678          | 0.5844494 | Island          | gb KY860920.1  Pinus resinosa 26S ribosomal RNA gene, partial sequence                                             |                       | 620   | e-174    | -0.002173156      |             |
| 12446                           | 58         | APFE030813233.1 | 186110   | 0.7973113           | 0.3468524 | Shore           | gb HM853297.1  Pinus pinaster malate dehydrogenase (mdhB) gene, partial cds                                        |                       | 244   | 2.00E-60 | 0.038300859       |             |
| 12447                           | 80         | APFE030813233.1 | 186111   | 0.7573683           | 0.5844494 | Shore           | gb HM853297.1  Pinus pinaster malate dehydrogenase (mdhB) gene, partial cds                                        |                       | 244   | 2.00E-60 | 0.051582229       |             |
| 12490                           | 0          | APFE030814641.1 | 247938   | 0.5675825           | 0.8206907 | Open Sea        | emb CR854964.10  Zebrafish DNA sequence from clone DKEY-58J19 in linkage group 1, complete                         |                       | 48    | 2.50E-01 | 0.009373239       |             |
| 12872                           | 0          | APFE030835997.1 | 139      | 0.510232            | 0.8206907 | Open Sea        | gb AC241320.1  Pinus taeda clone PT_7Ba3204L22, complete sequence                                                  |                       | 139   | 9.00E-29 | 0.212277493       |             |
| 13691                           | 0          | APFE030886677.1 | 538      | -0.6668645          | 0.6348307 | Island          | gb KY860920.1  Pinus resinosa 26S ribosomal RNA gene, partial sequence                                             |                       | 771   | 0.00E+00 | -0.011321856      |             |
| 14607                           | 11         | APFE030948861.1 | 29216    | -0.6849999          | 0.6348307 | Open Sea        | ref XM_023867035.1  PREDICTED: Cryptotermes secundus E3 ubiquitin-protein ligase RAD18-like, transcript variant X2 |                       | 54    | 4.00E-03 | -0.023048274      |             |
| 15749                           | 86         | APFE031018063.1 | 67326    | 0.7986305           | 0.3468524 | Open Sea        | gb BT124256.1  Picea sitchensis clone WS0472_E12 unknown mRNA                                                      |                       | 62    | 2.00E-05 | 0.096983584       |             |
| 15751                           | 45         | APFE031018063.1 | 67332    | 0.7723404           | 0.461431  | Open Sea        | gb BT124256.1  Picea sitchensis clone WS0472_E12 unknown mRNA                                                      |                       | 62    | 2.00E-05 | 0.033412522       |             |
| 16108                           | 0          | APFE031042600.1 | 129199   | -0.6525636          | 0.6422765 | Open Sea        | gb AC241350.1  Pinus taeda clone PT_7Ba4261I04, complete sequence                                                  |                       | 145   | 1.00E-30 | -0.015568055      |             |
| 19071                           | 10         | APFE031250081.1 | 44978    | -0.6397717          | 0.6791496 | Open Sea        | gb AC241293.1  Pinus taeda clone PT_7Ba2900E24, complete sequence                                                  |                       | 141   | 2.00E-29 | -0.018881856      |             |
| 19089                           | 26         | APFE031252417.1 | 24795    | 0.6642303           | 0.6348307 | Open Sea        | emb AM458575.2  Vitis vinifera contig VV78X161277.5, whole genome shotgun sequence                                 |                       | 52    | 1.60E-02 | 0.080967158       |             |
| 19759                           | 83         | APFE031293786.1 | 333      | -0.8095382          | 0.3468524 | Open Sea        | gb KY860920.1  Pinus resinosa 26S ribosomal RNA gene, partial sequence                                             |                       | 605   | e-169    | -0.016476236      |             |
| 19760                           | 80         | APFE031293786.1 | 340      | -0.8168549          | 0.3468524 | Open Sea        | gb KY860920.1  Pinus resinosa 26S ribosomal RNA gene, partial sequence                                             |                       | 605   | e-169    | -0.017965071      |             |
| 20699                           | 35         | APFE031355998.1 | 7890     | -0.7457455          | 0.5844494 | Shore           | gb KY860920.1  Pinus resinosa 26S ribosomal RNA gene, partial sequence                                             |                       | 747   | 0.00E+00 | -0.021921399      |             |
| 22259                           | 0          | APFE031461857.1 | 98665    | -0.6296329          | 0.6902063 | Open Sea        | gb AC241316.1  Pinus taeda clone PT_7Ba3194A17, complete sequence                                                  |                       | 222   | 8.00E-54 | -0.02126557       |             |
| 24048                           | 6          | APFE031593997.1 | 48022    | -0.6481513          | 0.6604906 | Open Sea        | emb LR132053.1  Anabas testudineus genome assembly, chromosome: 2                                                  |                       | 46    | 1.00E+00 | -0.003077815      |             |
| 24772                           | 31         | APFE031643940.1 | 37940    | -0.5982827          | 0.7699768 | Open Sea        | ref XM_008462945.2  PREDICTED: Cucumis melo uncharacterized LOC103499830 (LOC103499830), mRNA                      |                       | 46    | 1.00E+00 | -0.000930533      |             |
| 26419                           | 0          | APFE031751617.1 | 8348     | -0.6759993          | 0.6348307 | Open Sea        | gb AC241283.1  Pinus taeda clone PT_7Ba0038G01, complete sequence                                                  |                       | 137   | 4.00E-28 | -0.043467286      |             |
| Avg Robustness 20.21 (+/- 4.99) |            |                 |          |                     |           |                 |                                                                                                                    |                       |       |          | Intercept         | 25.05316718 |

# MOLECULAR ECOLOGY RESOURCES

| Site           | Robustness | Scaffold        | Position | Pearson    | P Value    | Genomic Region | Supplemental Table 4. CHG elastic net model                                                                                 | Score     | E Value  | Model Coefficient |
|----------------|------------|-----------------|----------|------------|------------|----------------|-----------------------------------------------------------------------------------------------------------------------------|-----------|----------|-------------------|
| 179            | 0          | APFE030007596.1 | 38804    | -0.819627  | 0.05246022 | Island         | Blast (400 BP Window)                                                                                                       | 68        | 3.00E-07 | -0.007445384      |
| 2281           | 6          | APFE030117462.1 | 121500   | 0.6722937  | 0.43912359 | Open Sea       | gb AC241265.2  Pinus taeda clone PT_7Ba0002H13, complete sequence                                                           | 48        | 0.25     | 0.008808399       |
| 3115           | 28         | APFE030156380.1 | 346869   | -0.8233699 | 0.05246022 | Island         | ref XM_019687934.1  PREDICTED: Aedes albopictus eukaryotic translation initiation factor                                    | 141       | 2.00E-29 | -0.012793687      |
| 3124           | 11         | APFE030156380.1 | 346924   | -0.8222629 | 0.05246022 | Island         | gb AC241265.2  Pinus taeda clone PT_7Ba0002H13, complete sequence                                                           | 141       | 2.00E-29 | -0.005433015      |
| 3125           | 3          | APFE030156380.1 | 346933   | -0.7972243 | 0.07600326 | Island         | gb AC241265.2  Pinus taeda clone PT_7Ba0002H13, complete sequence                                                           | 141       | 2.00E-29 | -0.007152663      |
| 3587           | 78         | APFE030180286.1 | 185036   | 0.5912766  | 0.79690452 | Open Sea       | gb CP023124.1  Lupinus angustifolius cultivar Tanjil chromosome LG-12                                                       | 48        | 0.25     | 0.023924566       |
| 4242           | 31         | APFE030221227.1 | 21877    | 0.6609115  | 0.5067384  | Open Sea       | gb CP022743.1  Mucilaginibacter sp. BJC16-A31, complete genome                                                              | 46        | 1        | 0.024174066       |
| 4243           | 15         | APFE030221227.1 | 21909    | 0.6524559  | 0.5535547  | Open Sea       | gb CP022743.1  Mucilaginibacter sp. BJC16-A31, complete genome                                                              | 46        | 1        | 0.029399465       |
| 4690           | 0          | APFE030242985.1 | 23615    | -0.7661441 | 0.12831023 | Shelf          | gb AC241357.1  Pinus taeda clone PT_7Ba4350E08, complete sequence                                                           | 74        | 4.00E-09 | -0.00856212       |
| 8659           | 55         | APFE030474771.1 | 62256    | -0.8139916 | 0.05805196 | Open Sea       | gb AC241319.2  Pinus taeda clone PT_7Ba3200G14, complete sequence                                                           | 129       | 9.00E-26 | -0.042836361      |
| 9941           | 66         | APFE030550909.1 | 450854   | -0.8182333 | 0.05246022 | Shore          | gb HQ396778.1  Maullinia ectocarpus clone c5 polyubiquitin gene, partial sequence                                           | 66        | 1.00E-06 | -0.013008002      |
| 11405          | 0          | APFE030630843.1 | 23995    | 0.726926   | 0.23982717 | Open Sea       | gb BT118267.1  Picea glauca clone G04004_G10 mRNA sequence                                                                  | 86        | 1.00E-12 | 0.006253003       |
| 16108          | 30         | APFE030899769.1 | 30167    | -0.7815293 | 0.10631385 | Open Sea       | gb KF418024.1  Pinus yunnanensis microsatellite PyG21R sequence                                                             | 222       | 8.00E-54 | -0.007856223      |
| 16261          | 100        | APFE030912860.1 | 23919    | -0.8501721 | 0.03482505 | Open Sea       | gb AC241341.1  Pinus taeda clone PT_7Ba4050C22, complete sequence                                                           | 101       | 2.00E-17 | -0.038099147      |
| 16265          | 100        | APFE030912860.1 | 23958    | -0.8630101 | 0.02957533 | Open Sea       | gb AC241341.1  Pinus taeda clone PT_7Ba4050C22, complete sequence                                                           | 101       | 2.00E-17 | -0.028198307      |
| 16266          | 4          | APFE030912860.1 | 23963    | -0.7263384 | 0.23982717 | Open Sea       | gb AC241341.1  Pinus taeda clone PT_7Ba4050C22, complete sequence                                                           | 101       | 2.00E-17 | -0.000451613      |
| 17019          | 71         | APFE030960074.1 | 37304    | -0.8023064 | 0.07593744 | Shore          | gb AC241357.1  Pinus taeda clone PT_7Ba4350E08, complete sequence                                                           | 434       | e-117    | -0.013703889      |
| 17723          | 100        | APFE030995986.1 | 235730   | -0.8929755 | 0.00904229 | Island         | gb AC241265.2  Pinus taeda clone PT_7Ba0002H13, complete sequence                                                           | 88        | 3.00E-13 | -0.08987676       |
| 19149          | 0          | APFE031074694.1 | 203390   | -0.7787887 | 0.10631385 | Open Sea       | gb AC241340.1  Pinus taeda clone PT_7Ba3966E14, complete sequence                                                           | 168       | 1.00E-37 | -0.027049412      |
| 20441          | 26         | APFE031148608.1 | 70419    | 0.6716662  | 0.43912359 | Shelf          | gb HM853297.1  Pinus pinaster malate dehydrogenase (mdhB) gene, partial cds                                                 | 287       | 2.00E-73 | 0.000185407       |
| 23239          | 7          | APFE031308732.1 | 4957     | -0.675735  | 0.43422847 | Shelf          | gb KF418024.1  Pinus yunnanensis microsatellite PyG21R sequence                                                             | 230       | 3.00E-56 | -0.036838213      |
| 23550          | 57         | APFE031328690.1 | 28908    | -0.8555158 | 0.03313625 | Shelf          | gb CP027084.1  Bos mutus isolate yakQH1 chromosome 16                                                                       | 52        | 1.60E-02 | -0.030942121      |
| 23986          | 14         | APFE031352602.1 | 177331   | 0.7678366  | 0.12525176 | Open Sea       | gb CP003742.1  Octadecabacter arcticus 238, complete genome                                                                 | 50        | 6.40E-02 | 0.000114774       |
| 24753          | 2          | APFE031397079.1 | 20243    | -0.8184794 | 0.05246022 | Shore          | gb AC241270.1  Pinus taeda clone PT_7Ba0014H13, complete sequence                                                           | 301       | 1.00E-77 | -0.001620236      |
| 25692          | 5          | APFE031453673.1 | 12701    | 0.5691848  | 0.79690452 | Open Sea       | gb CP023766.1  Solanum lycopersicum cultivar i-3 chromosome 10                                                              | 48        | 2.50E-01 | 0.009796582       |
| 25943          | 46         | APFE031468650.1 | 339818   | -0.8888931 | 0.00904229 | Shore          | gb AC241351.1  Pinus taeda clone PT_7Ba4290D18, complete sequence                                                           | 444       | e-120    | -0.034185619      |
| 26577          | 100        | APFE031511386.1 | 11914    | 0.7886135  | 0.09263071 | Open Sea       | dbj APO15040.1  Vigna angularis var. angularis DNA, chromosome 7, almost complete sequence                                  | 48        | 2.50E-01 | 0.043460084       |
| 28205          | 5          | APFE031612942.1 | 217743   | -0.7607781 | 0.1359269  | Open Sea       | gb AC241277.1  Pinus taeda clone PT_7Ba0032C08, complete sequence                                                           | 353       | 3.00E-93 | -0.005599988      |
| 28364          | 1          | APFE031619745.1 | 77331    | -0.794486  | 0.07870818 | Shore          | gb AC241270.1  Pinus taeda clone PT_7Ba0014H13, complete sequence                                                           | 2.42E+02  | 8.00E-60 | -0.009614305      |
| 28669          | 0          | APFE031637427.1 | 115414   | -0.5714462 | 0.79690452 | Open Sea       | gb KY964286.1  Pinus taeda chloroplast, complete genome                                                                     | 228       | 1.00E-55 | -0.003027496      |
| 29048          | 60         | APFE031660503.1 | 89970    | 0.8109091  | 0.0614307  | Open Sea       | 013188231.1  Anser cygnoides domesticus sarcoglycan, gamma [33kDa dystrophin-associated glycoprotein], transcript variant x | 46        | 1.00E+00 | 0.099306863       |
| 29392          | 6          | APFE031681806.1 | 197213   | -0.6394637 | 0.60091529 | Open Sea       | gb KF418024.1  Pinus yunnanensis microsatellite PyG21R sequence                                                             | 167       | 4.00E-37 | -3.61E-05         |
| 29550          | 47         | APFE031693069.1 | 277919   | -0.581322  | 0.79690452 | Open Sea       | gb AC241279.1  Pinus taeda clone PT_7Ba0032H02, complete sequence                                                           | 52        | 1.60E-02 | -3.48E-05         |
| 29552          | 64         | APFE031693069.1 | 277928   | -0.7440746 | 0.18704229 | Open Sea       | gb AC241279.1  Pinus taeda clone PT_7Ba0032H02, complete sequence                                                           | 52        | 1.60E-02 | -0.007204891      |
| 29742          | 0          | APFE031700512.1 | 50272    | 0.2495901  | 0.87345139 | Shelf          | emb LR031576.1  Brassica rapa genome, scaffold: A04                                                                         | 54        | 4.00E-03 | 0.001320484       |
| Avg Robustness |            |                 |          |            |            |                | 32.51 (+/- 5.86)                                                                                                            | Intercept |          | 38.1914076        |

# MOLECULAR ECOLOGY RESOURCES

Supplemental Table S. Combined CpG and CHG elastic net model

| Site  | Context | Robustness | Scaffold        | Position | Pearson Correlation | P Value    | Cytosine Region | Blast (400 BP Window)                                                                                                                  | Score | E Value  | Model Coefficient |
|-------|---------|------------|-----------------|----------|---------------------|------------|-----------------|----------------------------------------------------------------------------------------------------------------------------------------|-------|----------|-------------------|
| 4044  | CpG     | 16         | APFE030247699.1 | 1141     | -0.6166899          | 0.71166098 | Open Sea        | dbj D38246.1  Pinus luchuensis gene for 18S rRNA                                                                                       | 660   | 0        | -0.014690729      |
| 10300 | CpG     | 0          | APFE030640856.1 | 46646    | -0.7060463          | 0.38363995 | Island          | ref XM_015758670.2  PREDICTED: <i>Oryza sativa</i> Japonica Group proline-rich protein 36                                              | 46    | 1.00E+00 | -0.006552247      |
| 10836 | CpG     | 32         | APFE030701677.1 | 156970   | -0.7089463          | 0.38316459 | Open Sea        | gb CP027083.1  <i>Bos mutus</i> isolate yakOHI chromosome 15                                                                           | 46    | 1.30E+00 | -0.013530092      |
| 12446 | CpG     | 2          | APFE030813233.1 | 186110   | 0.8384045           | 0.05596322 | Shore           | gb HMMS53297.1  <i>Pinus pinaster</i> malate dehydrogenase (mdh8) gene, partial cds                                                    | 244   | 2.00E-60 | 0.018384386       |
| 14607 | CpG     | 4          | APFE030948861.1 | 29216    | -0.671841           | 0.49346882 | Open Sea        | ref XM_023867035.1  PREDICTED: <i>Cryptotermes secundus</i> E3 ubiquitin-protein ligase                                                | 54    | 4.00E-03 | -0.007251235      |
| 17327 | CpG     | 6          | APFE031127834.1 | 4424     | -0.6709793          | 0.49346882 | Shore           | gb AC241294.1  <i>Pinus taeda</i> clone PT_7Ba290002, complete sequence                                                                | 381   | e-102    | -0.013427725      |
| 19759 | CpG     | 22         | APFE031293786.1 | 333      | -0.8151544          | 0.07674729 | Open Sea        | gb KY860920.1  <i>Pinus resinosa</i> 26S ribosomal RNA gene, partial sequence                                                          | 605   | e-169    | -0.024244335      |
| 19760 | CpG     | 21         | APFE031293786.1 | 340      | -0.8236261          | 0.07136371 | Open Sea        | gb KY860920.1  <i>Pinus resinosa</i> 26S ribosomal RNA gene, partial sequence                                                          | 605   | e-169    | -0.022969672      |
| 19761 | CpG     | 4          | APFE031293786.1 | 347      | -0.7615778          | 0.21996887 | Open Sea        | gb KY860920.1  <i>Pinus resinosa</i> 26S ribosomal RNA gene, partial sequence                                                          | 605   | e-169    | -3.19E-06         |
| 20699 | CpG     | 84         | APFE031355998.1 | 7800     | -0.7457455          | 0.27281301 | Shore           | gb KY860920.1  <i>Pinus resinosa</i> 26S ribosomal RNA gene, partial sequence                                                          | 747   | 0.00E+00 | -0.001246402      |
| 26417 | CpG     | 11         | APFE031751617.1 | 8319     | 0.7624409           | 0.21996887 | Open Sea        | gb AC241283.1  <i>Pinus taeda</i> clone PT_7Ba0038G01, complete sequence                                                               | 137   | 4.00E-28 | 0.032530321       |
| 197   | CHG     | 45         | APFE030007596.1 | 38951    | -0.8365761          | 0.05596322 | Island          | gb AC241265.2  <i>Pinus taeda</i> clone PT_7Ba0002H13, complete sequence                                                               | 68    | 3.00E-07 | -0.007290976      |
| 2212  | CHG     | 2          | APFE030114720.1 | 66598    | 0.6199171           | 0.70354547 | Open Sea        | gb KY964286.1  <i>Pinus taeda</i> chloroplast, complete genome                                                                         | 458   | e-125    | 0.103090424       |
| 2281  | CHG     | 2          | APFE030117462.1 | 121500   | 0.6722937           | 0.49346882 | Open Sea        | ref XM_019687934.1  PREDICTED: <i>Aedes albopictus</i> eukaryotic translation initiation factor                                        | 48    | 2.50E-01 | 0.003565166       |
| 3115  | CHG     | 35         | APFE030156380.1 | 346869   | -0.8207599          | 0.07136371 | Island          | gb AC241265.2  <i>Pinus taeda</i> clone PT_7Ba0002H13, complete sequence                                                               | 141   | 2.00E-29 | -0.012602914      |
| 3124  | CHG     | 11         | APFE030156380.1 | 346924   | -0.822286           | 0.07136371 | Island          | gb AC241265.2  <i>Pinus taeda</i> clone PT_7Ba0002H13, complete sequence                                                               | 141   | 2.00E-29 | -0.003528854      |
| 4242  | CHG     | 21         | APFE030212127.1 | 21877    | 0.6066647           | 0.74662545 | Open Sea        | gb CP022743.1  <i>Mucilaginibacter</i> sp. B1C16-A31, complete genome                                                                  | 46    | 1.00E+00 | 0.002829825       |
| 4243  | CHG     | 10         | APFE030212127.1 | 21909    | 0.601406            | 0.76414416 | Open Sea        | gb CP022743.1  <i>Mucilaginibacter</i> sp. B1C16-A31, complete genome                                                                  | 46    | 1.00E+00 | 0.010099597       |
| 4692  | CHG     | 10         | APFE030242985.1 | 42486    | 0.6858277           | 0.45547678 | Open Sea        | gb AC241283.1  <i>Pinus taeda</i> clone PT_7Ba0038G01, complete sequence                                                               | 274   | 2.00E-69 | 0.024580632       |
| 4868  | CHG     | 35         | APFE030255408.1 | 6179     | -0.6973797          | 0.40891398 | Open Sea        | gb AC241265.2  <i>Pinus taeda</i> clone PT_7Ba0002H13, complete sequence                                                               | 98    | 3.00E-16 | -0.022840831      |
| 8659  | CHG     | 24         | APFE030474771.1 | 62356    | -0.7971943          | 0.11024773 | Open Sea        | gb AC241319.2  <i>Pinus taeda</i> clone PT_7Ba3200G14, complete sequence                                                               | 129   | 9.00E-26 | -0.0289986        |
| 9941  | CHG     | 22         | APFE030550909.1 | 450854   | -0.8182333          | 0.07136371 | Shore           | gb HQ396778.1  <i>Maulinia ectocarpus</i> clone c5 polyubiquitin gene, partial sequence                                                | 66    | 1.00E-06 | -0.003448074      |
| 16261 | CHG     | 91         | APFE030912860.1 | 23919    | -0.8501721          | 0.04730297 | Open Sea        | gb AC241341.1  <i>Pinus taeda</i> clone PT_7Ba4050C22, complete sequence                                                               | 101   | 2.00E-17 | -0.034710315      |
| 16264 | CHG     | 85         | APFE030912860.1 | 23950    | -0.799363           | 0.11024773 | Open Sea        | gb AC241341.1  <i>Pinus taeda</i> clone PT_7Ba4050C22, complete sequence                                                               | 101   | 2.00E-17 | -0.018184445      |
| 16265 | CHG     | 100        | APFE030912860.1 | 23958    | -0.8630101          | 0.04730297 | Open Sea        | gb AC241341.1  <i>Pinus taeda</i> clone PT_7Ba4050C22, complete sequence                                                               | 101   | 2.00E-17 | -0.034618833      |
| 16266 | CHG     | 17         | APFE030912860.1 | 23963    | -0.7263384          | 0.34830679 | Open Sea        | gb AC241341.1  <i>Pinus taeda</i> clone PT_7Ba4050C22, complete sequence                                                               | 101   | 2.00E-17 | -0.009208997      |
| 16641 | CHG     | 1          | APFE030938563.1 | 91250    | -0.6048775          | 0.75191834 | Open Sea        | ref XM_018854053.1  <i>Metschnikowia bicupidata</i> var. <i>bicupidata</i> NRRL YB-4993 hypothetical protein (METBIDRAFT_116685), mRNA | 52    | 1.60E-02 | -0.000957479      |
| 17019 | CHG     | 11         | APFE030960074.1 | 37304    | -0.7988719          | 0.11024773 | Shore           | gb AC241357.1  <i>Pinus taeda</i> clone PT_7Ba4350E08, complete sequence                                                               | 434   | e-117    | -0.010465391      |
| 17723 | CHG     | 100        | APFE030995986.1 | 235730   | -0.9065709          | 0.0048033  | Island          | gb AC241265.2  <i>Pinus taeda</i> clone PT_7Ba0002H13, complete sequence                                                               | 88    | 3.00E-13 | -0.08792942       |
| 20779 | CHG     | 30         | APFE031170467.1 | 52691    | -0.8369123          | 0.05596322 | Open Sea        | gb AC241357.1  <i>Pinus taeda</i> clone PT_7Ba4350E08, complete sequence                                                               | 196   | 4.00E-46 | -0.008197411      |
| 20780 | CHG     | 4          | APFE031170467.1 | 52713    | -0.7981939          | 0.11024773 | Open Sea        | gb AC241357.1  <i>Pinus taeda</i> clone PT_7Ba4350E08, complete sequence                                                               | 196   | 4.00E-46 | -0.007110912      |
| 23550 | CHG     | 58         | APFE031328690.1 | 28908    | -0.8555158          | 0.04730297 | Shelf           | gb CP027084.1  <i>Bos mutus</i> isolate yakOHI chromosome 16                                                                           | 52    | 1.60E-02 | -0.014444269      |
| 25943 | CHG     | 68         | APFE031468650.1 | 339818   | -0.9055554          | 0.0048033  | Shore           | gb AC241351.1  <i>Pinus taeda</i> clone PT_7Ba4290D18, complete sequence                                                               | 444   | e-120    | -0.041425247      |
| 26577 | CHG     | 0          | APFE031511386.1 | 11914    | 0.8246048           | 0.07136371 | Open Sea        | dbj AP015040.1  <i>Vigna angularis</i> var. <i>angularis</i> DNA, chromosome 7, almost complete sequence                               | 48    | 2.50E-01 | 0.043957927       |
| 28213 | CHG     | 0          | APFE031612942.1 | 217788   | -0.832742           | 0.05628182 | Open Sea        | gb AC241277.1  <i>Pinus taeda</i> clone PT_7Ba003C008, complete sequence                                                               | 418   | e-113    | -0.012395417      |
| 29724 | CHG     | 0          | APFE031699699.1 | 101384   | 0.6829002           | 0.45677828 | Open Sea        | ref NC_037753.1  <i>Bretschneidera sinensis</i> chloroplast, complete genome                                                           | 52    | 1.60E-02 | 0.00169185        |
| 30205 | CHG     | 0          | APFE031729853.1 | 48198    | -0.7309376          | 0.32194597 | Open Sea        | emb LK612858.1  <i>Dicrocoelium dendriticum</i> genome assembly D_dendriticum_Leon_v1_0_4                                              | 155   | 2.00E-33 | -0.00368355       |
| 30400 | CHG     | 0          | APFE031742049.1 | 13035    | -0.716403           | 0.37593467 | Open Sea        |                                                                                                                                        | 48    | 2.50E-01 | -0.007650197      |

Avg Robustness 25.89 (+/- 5.00)

# MOLECULAR ECOLOGY RESOURCES

Supplemental Table 6. CpG Pearson models (5 and 10 cytosines)

| Site                    | Robustness | Scaffold         | Position | Pearson Correlation | P Value   | Cytosine Region | Blast (400 BP Window)                                                                 | Score | E Value  | Top 5 Model Coefficient | Top 10 Model Coefficient | Intercept       |
|-------------------------|------------|------------------|----------|---------------------|-----------|-----------------|---------------------------------------------------------------------------------------|-------|----------|-------------------------|--------------------------|-----------------|
| 19760                   | 80         | APFE031293786.1  | 340      | -0.8168549          | 0.3468524 | Open Sea        | gb KY860920.1  Pinus resinosa 26S ribosomal RNA gene, partial sequence                | 605   | e-169    | -0.15482                | -0.878                   |                 |
| 15749                   | 86         | APFE031018063.1  | 67326    | 0.7986305           | 0.3468524 | Open Sea        | gb BT124256.1  Picea sitchensis clone WS0472_E12 unknown mRNA                         | 62    | 2.00E-05 | 0.2903                  | -0.2809                  |                 |
| 12446                   | 58         | APFE030813233.1  | 186110   | 0.7973113           | 0.3468524 | Shore           | gb HM85297.1  Pinus pinaster malate dehydrogenase (mdh8) gene, partial cds            | 244   | 2.00E-60 | 0.10704                 | 0.1992                   |                 |
| 6241                    | 9          | APFE030936059.1  | 43218    | -0.723175           | 0.461431  | Open Sea        | ret NC_038215.1  Cyanophora judae strain NIES-754 plastid, complete genome            | 46    | 1        | 0.02812                 | -0.0971                  |                 |
| 20699                   | 35         | APFE031355998.1  | 7890     | -0.7457455          | 0.5844494 | Shore           | gb KY860920.1  Pinus resinosa 26S ribosomal RNA gene, partial sequence                | 747   | 0.00E+00 | -0.13621                | 0.5696                   | Top 5: 22.79307 |
| 8273                    | 3          | APFE030528492.1  | 85496    | -0.7445607          | 0.5844494 | Open Sea        | gb AC241325.1  Pinus taeda clone PT_7Ba3500A10, complete sequence                     | 50    | 6.40E-02 |                         | -0.3472                  |                 |
| 11132                   | 5          | APFE030723726.1  | 3588     | -0.6481513          | 0.6604906 | Open Sea        | gb HM85297.1  Pinus pinaster malate dehydrogenase (mdh8) gene, partial cds            | 182   | 7.00E-42 |                         | -0.2695                  |                 |
| 11724                   | 0          | APFE030757442.1  | 2043     | -0.7375678          | 0.5844494 | Island          | gb KY860920.1  Pinus resinosa 26S ribosomal RNA gene, partial sequence                | 620   | e-174    |                         | -0.9322                  |                 |
| 23380                   | 0          | APFE031541527.1  | 75437    | -0.5982827          | 0.7699768 | Shore           | gb KY860920.1  Pinus resinosa 26S ribosomal RNA gene, partial sequence                | 644   | 0.00E+00 |                         | 0.794                    |                 |
| 18276                   | 12         | APFE031192863.1  | 106705   | -0.6759993          | 0.6348307 | Open Sea        | emb HE574558.1  Pinus pinaster mRNA for pinoresinol-laricresinol reductase (plr gene) | 194   | 2.00E-45 |                         | 0.1276                   | Top 10: 52.8028 |
| Avg Robustness (Top 5)  |            | 53.6 (+/- 14.32) |          |                     |           |                 |                                                                                       |       |          |                         |                          |                 |
| Avg Robustness (Top 10) |            | 28.8 (+/- 10.72) |          |                     |           |                 |                                                                                       |       |          |                         |                          |                 |

# MOLECULAR ECOLOGY RESOURCES

Supplemental Table 7. CHG Pearson models (5 and 10 cytosines)

| Site                   | Robustness | Scaffold         | Position | Pearson Correlation | P Value    | Cytosine Region | Blast (400 BP Window)                                             | Score | E Value  | Top 5 Model Coefficient | Top 10 Model Coefficient | Intercept        |
|------------------------|------------|------------------|----------|---------------------|------------|-----------------|-------------------------------------------------------------------|-------|----------|-------------------------|--------------------------|------------------|
| 17723                  | 100        | APFE030995986.1  | 235730   | -0.8929755          | 0.00904229 | Island          | gb AC241265.2  Pinus taeda clone PT_7Ba0002H13, complete sequence | 88    | 3.00E-13 | -0.20782                | -0.41395375              |                  |
| 25943                  | 46         | APFE031468650.1  | 339818   | -0.8888931          | 0.00904229 | Shore           | gb AC241351.1  Pinus taeda clone PT_7Ba4290D18, complete sequence | 444   | e-120    | -0.07479                | -0.29605558              |                  |
| 16265                  | 100        | APFE030912860.1  | 23958    | -0.8630101          | 0.02957533 | Open Sea        | gb AC241341.1  Pinus taeda clone PT_7Ba4050C22, complete sequence | 101   | 2.00E-17 | -0.15581                | -0.12551913              |                  |
| 23550                  | 57         | APFE031328690.1  | 28908    | -0.8555158          | 0.03313625 | Shelf           | gb CP027084.1  Bos mutus isolate yakQH1 chromosome 16             | 52    | 1.00E-02 | -0.17155                | -0.25097601              |                  |
| 197                    | 10         | APFE030007596.1  | 38951    | -0.581322           | 0.79690452 | Island          | gb AC241265.2  Pinus taeda clone PT_7Ba0002H13, complete sequence | 68    | 3.00E-07 | 0.10013                 | 0.0700562                | Top 5: 51.04011  |
| 1837                   | 2          | APFE030092303.1  | 104992   | -0.7440746          | 0.18704229 | Open Sea        | gb AC241340.1  Pinus taeda clone PT_7Ba3966E14, complete sequence | 236   | 5.00E-58 |                         | 0.2650131                |                  |
| 3115                   | 28         | APFE030156380.1  | 346869   | -0.8233699          | 0.05246022 | Island          | gb AC241265.2  Pinus taeda clone PT_7Ba0002H13, complete sequence | 141   | 2.00E-29 |                         | -0.17643639              |                  |
| 20779                  | 15         | APFE031170467.1  | 52691    | 0.2495901           | 0.87345139 | Island          | gb AC241357.1  Pinus taeda clone PT_7Ba4350E08, complete sequence | 196   | 4.00E-46 |                         | 0.04057985               |                  |
| 3124                   | 11         | APFE030156380.1  | 346924   | -0.8222629          | 0.05246022 | Island          | gb AC241265.2  Pinus taeda clone PT_7Ba0002H13, complete sequence | 141   | 2.00E-29 |                         | 0.10968849               |                  |
| 179                    | 0          | APFE030007596.1  | 38804    | -0.819627           | 0.05246022 | Island          | gb AC241265.2  Pinus taeda clone PT_7Ba0002H13, complete sequence | 68    | 3.00E-07 |                         | 0.30582527               | Top 10: 51.52011 |
| Avg Robustness (Top5)  |            | 62.6 (+/- 17.13) |          |                     |            |                 |                                                                   |       |          |                         |                          |                  |
| Avg Robustness (Top10) |            | 36.9 (+/- 12.01) |          |                     |            |                 |                                                                   |       |          |                         |                          |                  |



# MOLECULAR ECOLOGY RESOURCES

Supplemental Table 8. Combined CpG and CHG Pearson models (5 and 10 cytosines)

| Site  | Context | Robustness | Scaffold        | Position | Pearson Correlation | P Value  | Cytosine Region | Blast (400 BP Window)                                                          | Score | E Value  | Top 5 Model Coefficient | Top 10 Model Coefficient | Intercept          |
|-------|---------|------------|-----------------|----------|---------------------|----------|-----------------|--------------------------------------------------------------------------------|-------|----------|-------------------------|--------------------------|--------------------|
| 17723 | CHG     | 100        | APFE03095986.1  | 235730   | -0.90657093         | 0.004803 | Island          | gb AC241265.2  Pinus taeda clone PT_7Ba0002H13, complete sequence              | 88    | 3.00E-13 | -0.21737                | -0.280356                |                    |
| 25943 | CHG     | 68         | APFE031468650.1 | 339818   | -0.905555442        | 0.004803 | Open Sea        | gb AC241351.1  Pinus taeda clone PT_7Ba4290D18, complete sequence              | 444   | e-120    | -0.1406                 | -0.16354                 |                    |
| 16265 | CHG     | 100        | APFE030912860.1 | 23958    | -0.863010148        | 0.047303 | Open Sea        | gb AC241341.1  Pinus taeda clone PT_7Ba4050C22, complete sequence              | 101   | 2.00E-17 | -0.07848                | -0.105378                |                    |
| 5002  | CHG     | 100        | APFE030266102.1 | 32477    | 0.858565258         | 0.047303 | Open Sea        | gb IQ519677.1  Rhopalosoma sp. SK-2012 voucher DM400 elongation factor 1 alpha | 56    | 0.001    | 0.03705                 | -0.006851                |                    |
| 23550 | CHG     | 58         | APFE031328690.1 | 28908    | -0.85515837         | 0.047303 | Shelf           | gb CP027084.1  Bos mutus isolate yakQH1 chromosome 16                          | 52    | 1.60E-02 | -0.04465                | -0.150913                | Top 5 : 48.57360   |
| 8273  | CpG     | 9          | APFE030528492.1 | 85496    | -0.845328122        | 0.051005 | Open Sea        | gb AC241325.1  Pinus taeda clone PT_7Ba3500A10, complete sequence              | 50    | 6.40E-02 |                         | -0.134639                |                    |
| 12446 | CpG     | 2          | APFE030813233.1 | 186110   | 0.838404521         | 0.055963 | Open Sea        | gb HM853297.1  Pinus pinaster malate dehydrogenase (mdhB) gene, partial cds    | 244   | 2.00E-60 |                         | -0.004067                |                    |
| 20779 | CHG     | 30         | APFE031170467.1 | 52691    | -0.836912349        | 0.055963 | Island          | gb AC241357.1  Pinus taeda clone PT_7Ba4350E08, complete sequence              | 196   | 4.00E-46 |                         | 0.028785                 |                    |
| 197   | CHG     | 46         | APFE030007596.1 | 38951    | -0.836576128        | 0.055963 | Island          | gb AC241265.2  Pinus taeda clone PT_7Ba0002H13, complete sequence              | 68    | 3.00E-07 |                         | 0.064688                 |                    |
| 1837  | CHG     | 6          | APFE030092303.1 | 104992   | -0.834273616        | 0.056282 | Open Sea        | gb AC241340.1  Pinus taeda clone PT_7Ba3966E14, complete sequence              | 236   | 5.00E-58 |                         | 0.208078                 | Top 10 : 53.340569 |

Avg Robustness (Top5) 85.2 (+/- 9.2)  
Avg Robustness (Top10) 51.9 (+/- 12.56)
